# Supplementary material for: Defect-induced deep red luminescence of CaGdAlO4-type layered perovskites: multi-cationic sites partial/full substitution and application in pc-LED and plant lighting
Source: Royal Society of Chemistry journal article supplement (doi:10.1039/d3dt02805d), 2023-01-01
Supplement: d3dt02805d1.pdf [file d3dt02805d1.pdf]

# Defects induced deep red luminescence of CaGdAlO<sub>4</sub>-type layered perovskite: multi-cationic sites partial/full substitution and application in pc-LED and plant lighting

Bowen Wang,<sup>a</sup> Changshuai Gong,<sup>a</sup> Xuyan Xue,<sup>a</sup> Meiting Li,<sup>c</sup> Qi Zhu,<sup>d</sup> Xuejiao Wang,<sup>a\*</sup> Ji-Guang Li<sup>b\*\*</sup>

<sup>a</sup>College of Chemistry and Materials Engineering, Bohai University, Jinzhou, Liaoning 121007, China

<sup>b</sup>Research Center for Functional Materials, National Institute for Materials Science, Tsukuba, Ibaraki 305-0044, Japan

<sup>c</sup>CAS Key Laboratory of Design and Assembly of Functional Nanostructures, Fujian Key Laboratory of Nanomaterials, Fujian Institute of Research on the Structure of Matter, Chinese Academy of Sciences, Fuzhou, 350002 China.

<sup>d</sup>Xiamen Key Laboratory of Rare Earth Photoelectric Functional Materials, Xiamen Institute of Rare Earth Materials, Haixi Institutes, Chinese Academy of Sciences, Xiamen, 361021 China

<sup>e</sup>School of Materials Science and Engineering, Liaoning University of Technology, Jinzhou, Liaoning 121001, China

<sup>f</sup>Key Laboratory for Anisotropy and Texture of Materials (Ministry of Education), School of Materials Science and Engineering, Northeastern University, Shenyang, Liaoning 110819, China

\*Corresponding author

Dr. Xuejiao Wang  
Bohai University  
Jianzhou, China  
Tel: +86-416-3400708  
E-mail: [wangxuejiao@bhu.edu.cn](mailto:wangxuejiao@bhu.edu.cn)

Dr. Ji-Guang Li  
National Institute for Materials Science  
Ibaraki, Japan  
Tel: +81-29-860-4394  
E-mail: [li.jiguang@nims.go.jp](mailto:li.jiguang@nims.go.jp)

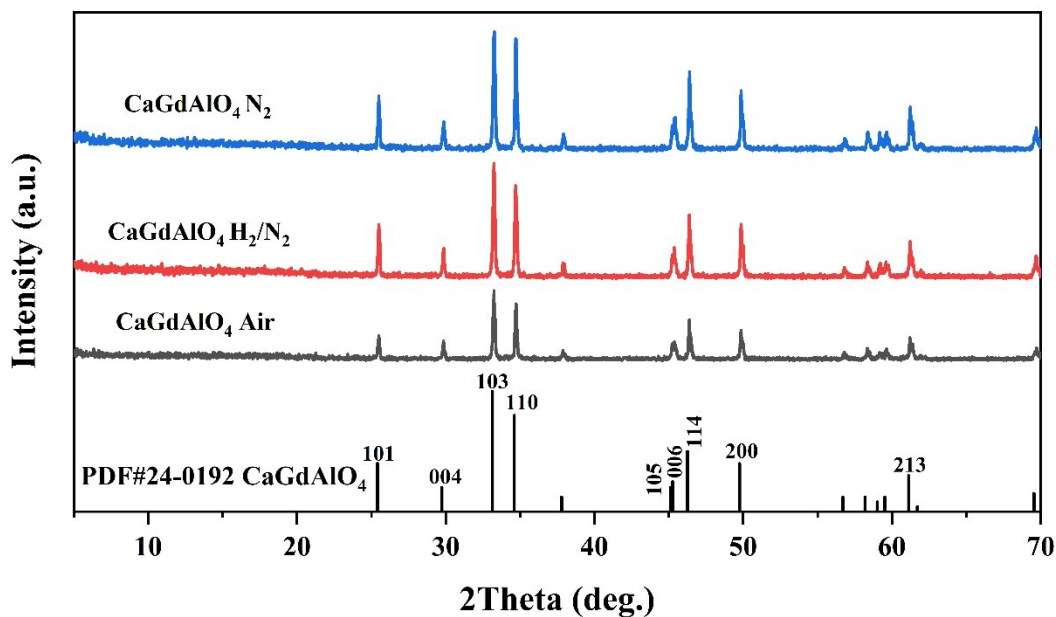

**Fig. S1** XRD patterns of the  $\text{CaGdAlO}_4$  samples synthesized in different atmospheres.

**Table S1** A summary of  $\text{O}_i:\text{V}_o$  ratios in intensity and in area of the XPS peaks for the  $\text{CaGdAlO}_4$  samples calcined in different atmospheres.

|                         | $\text{O}_i:\text{V}_o$<br>(in intensity) | $\text{O}_i:\text{V}_o$<br>(in area) |
|-------------------------|-------------------------------------------|--------------------------------------|
| Air                     | 1.93                                      | 3.45                                 |
| $\text{N}_2$            | 2.54                                      | 3.64                                 |
| $\text{H}_2+\text{N}_2$ | 1.57                                      | 2.33                                 |

**Table S2** A summary of the sub-peak position/intensity, trap depth ( $E_T$ ) and trap density ( $N_0$ ), which were obtained from the thermoluminescence spectra of the  $\text{CaGdAlO}_4$  samples calcined in different atmospheres.

| Atmosphere              | $T_1/(\text{°C})$ | Intensity <sub>1</sub> | $E_{T1}/(\text{eV})$ | $N_{01}$ | $T_2/(\text{°C})$ | Intensity <sub>2</sub> | $E_{T2}/(\text{eV})$ | $N_{02}$ |
|-------------------------|-------------------|------------------------|----------------------|----------|-------------------|------------------------|----------------------|----------|
| Air                     | 108.93            | 83.128                 | 0.766                | 735.608  | 233.01            | 235.781                | 1.014                | 2086.451 |
| $\text{N}_2$            | 113.85            | 84.953                 | 0.776                | 810.075  | 261.63            | 450.009                | 1.072                | 4291.089 |
| $\text{N}_2+\text{H}_2$ | -                 | -                      | -                    | -        | 240.36            | 510.338                | 1.029                | 3290.449 |

**Table S3** A summary of the results of fluorescence decay analysis for the samples synthesized with different Ca:Gd atomic ratios.

| Ca:Gd       | $A_1$    | $A_2$  | $\tau_1(\mu s)$ | $\tau_2(\mu s)$ | $\chi^2$ | $\tau_{av}(ms)$ |
|-------------|----------|--------|-----------------|-----------------|----------|-----------------|
| 0.990:1.010 | 12977.86 | 427.28 | 3.56            | 1775.63         | 1.399    | 1.652           |
| 0.995:1.005 | 13192.77 | 353.03 | 3.56            | 1865.95         | 1.112    | 1.764           |
| 1.000:1.000 | 14202.86 | 334.06 | 3.54            | 1741.39         | 1.178    | 1.603           |
| 1.005:0.995 | 12123.35 | 336.85 | 3.78            | 1751.51         | 1.106    | 1.626           |
| 1.010:0.990 | 11935.05 | 304.36 | 3.78            | 1721.49         | 1.204    | 1.585           |

**Table S4** A summary of the sub-peak position/intensity, trap depth ( $E_T$ ) and trap density ( $N_0$ ), which were obtained from the thermoluminescence spectra of the  $\text{CaGdAlO}_4$  samples synthesized with varying Ca:Gd atomic ratio.

| Ca:Gd       | $T_1/(^{\circ}\text{C})$ | Intensity <sub>1</sub> | $E_{T1}/(\text{eV})$ | $N_{01}$ | $T_2/(^{\circ}\text{C})$ | Intensity <sub>2</sub> | $E_{T2}/(\text{eV})$ | $N_{02}$ |
|-------------|--------------------------|------------------------|----------------------|----------|--------------------------|------------------------|----------------------|----------|
| 0.990:1.010 | 101.85                   | 95.903                 | 0.752                | 858.471  | 274.57                   | 357.297                | 1.097                | 3198.327 |
| 0.995:1.005 | 109.10                   | 134.508                | 0.767                | 1213.905 | 258.13                   | 478.185                | 1.065                | 4315.512 |
| 1.000:1.000 | 108.93                   | 83.128                 | 0.766                | 735.608  | 233.01                   | 235.781                | 1.014                | 2086.451 |
| 1.005:0.995 | 109.53                   | 48.225                 | 0.767                | 429.02   | 204.89                   | 106.192                | 0.958                | 944.707  |
| 1.010:0.990 | 111.58                   | 114.638                | 0.771                | 932.708  | 185.33                   | 183.596                | 0.919                | 1493.758 |

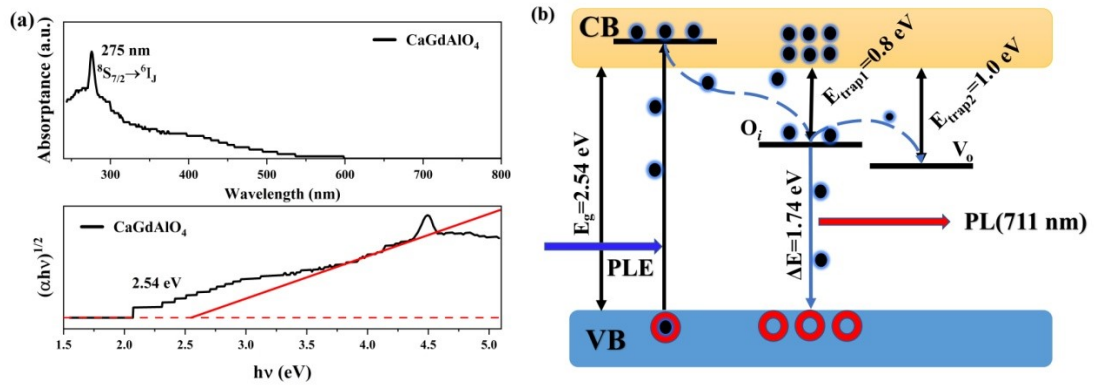

**Fig. S2** UV-vis absorption spectrum and  $(\alpha hv)^2$  vs  $h\nu$  plot for  $\text{CaGdAlO}_4$  (a), and a scheme for the proposed mechanism of luminescence (b).

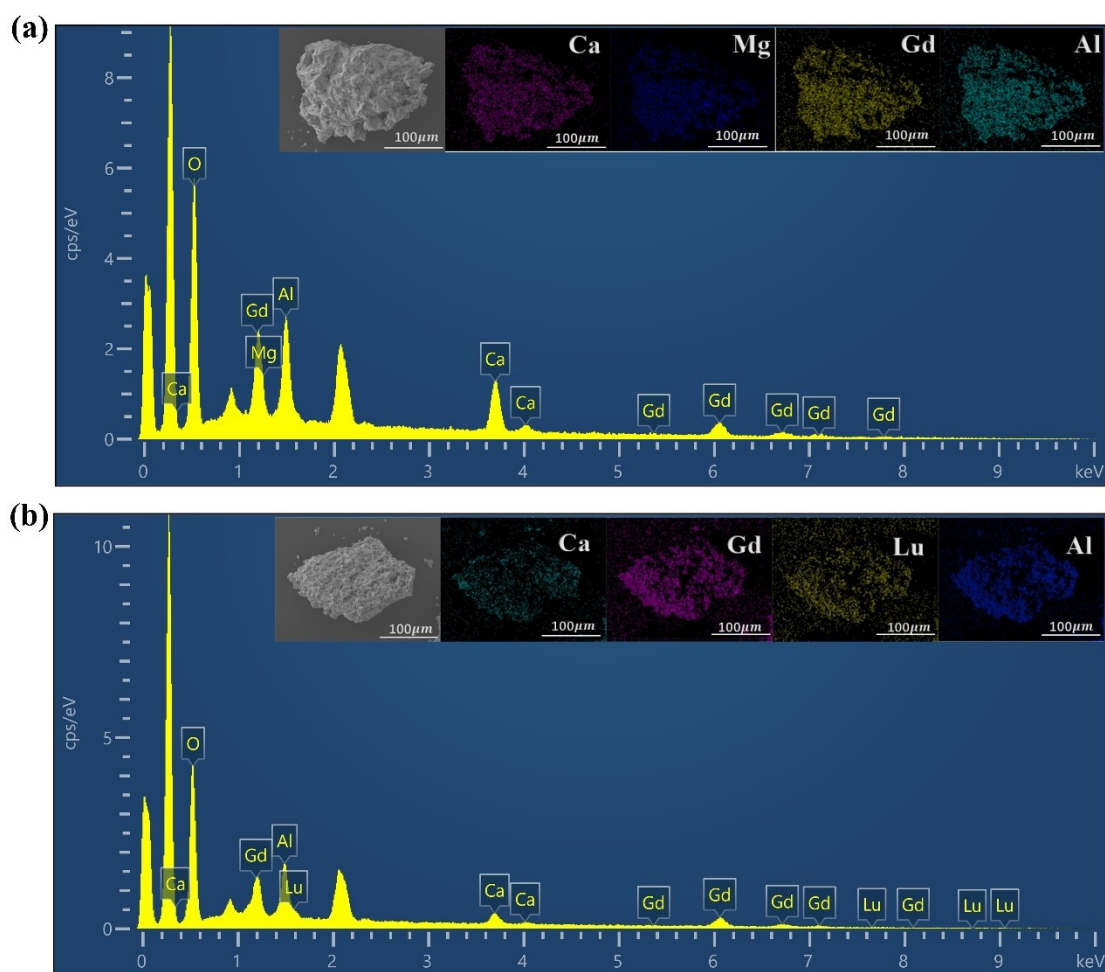

**Fig. S3** EDS spectra and the results of elemental mapping for samples partially substituted with  $Mg^{2+}$  (a) and  $Lu^{3+}$  (b).

**Table S5** A summary of ionic radius and the relative difference in ionic radius for  $Ca^{2+}$ ,  $Gd^{3+}$  and the substituting ions.

| Cation    | $R_{CN=9}$ | $D_r$  |
|-----------|------------|--------|
| $Ca^{2+}$ | 1.180      | -      |
| $Mg^{2+}$ | 0.890      | -24.6% |
| $Sr^{2+}$ | 1.310      | 9.9%   |
| $Ba^{2+}$ | 1.470      | 19.7%  |
| $Gd^{3+}$ | 1.107      | -      |
| $La^{3+}$ | 1.216      | 8.9%   |
| $Y^{3+}$  | 1.075      | -2.9%  |
| $Lu^{3+}$ | 1.032      | -6.8%  |

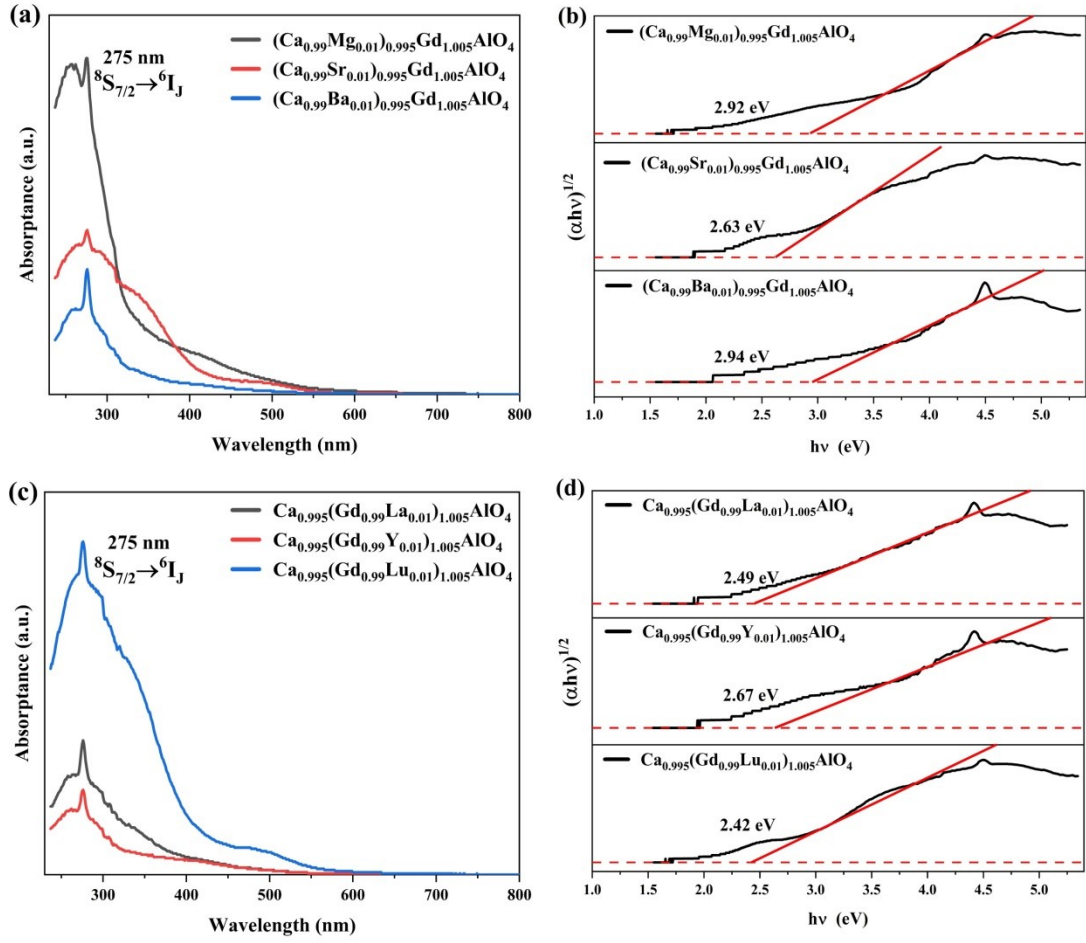

**Fig. S4** UV-vis absorption spectra (a, c) and the determination of bandgap energies (b, d) for Ca-site and Gd-site partially substituted products. The  $A$  in the Y-axis title of parts (b) and (d) represents absorbance, which is proportional to the absorption coefficient  $\alpha$ .

**Table S6** A summary of the results of fluorescence decay analysis for the samples with Ca and Gd sites partially substituted.

| Substituting ion | $A_1$    | $A_2$   | $\tau_1(\mu s)$ | $\tau_2(\mu s)$ | $\chi^2$ | $\tau_{av}(ms)$ |
|------------------|----------|---------|-----------------|-----------------|----------|-----------------|
| Mg <sup>2+</sup> | 115.76   | 244.15  | 336.9           | 1792.64         | 1.049    | 1.673           |
| Sr <sup>2+</sup> | 14058.08 | 241.78  | 3.48            | 1701.47         | 1.220    | 1.521           |
| Ba <sup>2+</sup> | 14269.57 | 277.07  | 3.45            | 1768.34         | 1.298    | 1.607           |
| La <sup>3+</sup> | 12125.22 | 204.46  | 3.71            | 1691.74         | 0.962    | 1.497           |
| Y <sup>3+</sup>  | 15487.45 | 242.78  | 3.36            | 1737.46         | 0.998    | 1.547           |
| Lu <sup>3+</sup> | 881.37   | 1099.93 | 559.33          | 2043.01         | 1.791    | 1.776           |

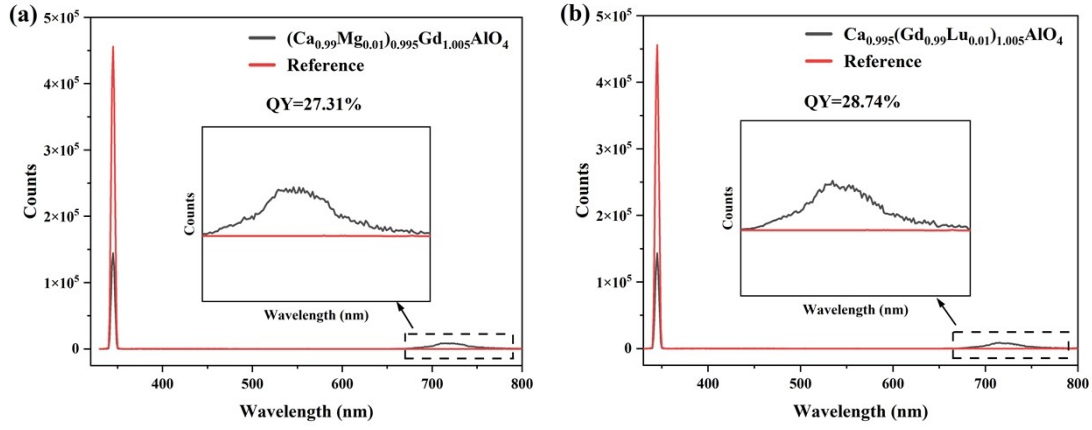

**Fig. S5** Quantum yield analysis for the products partially substituted by  $\text{Mg}^{2+}$  and  $\text{Lu}^{3+}$ .

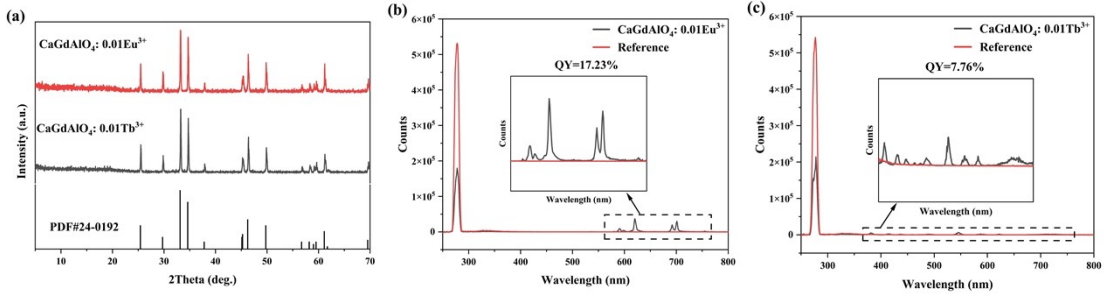

**Fig. S6** The XRD patterns of  $\text{CaGdAlO}_4:0.01\text{Tb}^{3+}$  and  $\text{CaGdAlO}_4:0.01\text{Eu}^{3+}$  (a), and quantum yield analysis for  $\text{CaGdAlO}_4:0.01\text{Eu}^{3+}$  (b) and  $\text{CaGdAlO}_4:0.01\text{Tb}^{3+}$  (c).

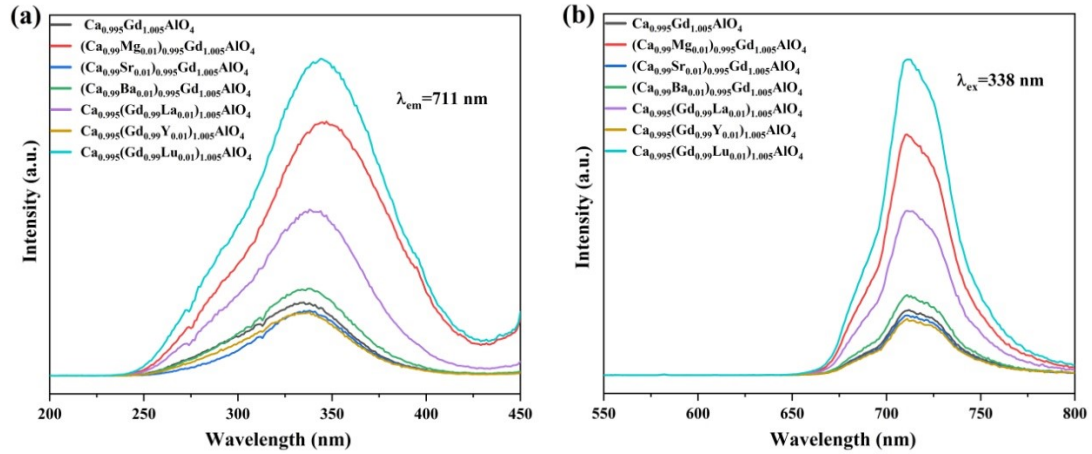

**Fig. S7** Photoluminescence spectra of the  $\text{CaGdAlO}_4$  products, whose Ca and Gd sites were partially substituted.

**Table S7** A summary of the results of fluorescence decay analysis for  $\text{CaYAlO}_4$  and  $\text{CaGdAlO}_4$ .

| Compound           | $A_1$    | $A_2$  | $\tau_1(\mu\text{s})$ | $\tau_2(\mu\text{s})$ | $\chi^2$ | $\tau_{av}(\text{ms})$ |
|--------------------|----------|--------|-----------------------|-----------------------|----------|------------------------|
| $\text{CaGdAlO}_4$ | 14202.86 | 334.06 | 3.54                  | 1741.39               | 1.178    | 1.603                  |
| $\text{CaYAlO}_4$  | 355.13   | 438.98 | 911.3                 | 2758.42               | 1.691    | 2.369                  |

**Table S8** A summary of the sub-peak position/intensity, trap depth ( $E_T$ ) and trap density ( $N_0$ ), which were obtained from the thermoluminescence spectra of  $\text{CaYAlO}_4$  and  $\text{CaGdAlO}_4$ .

| Compound           | $T_1/(^{\circ}\text{C})$ | Intensity <sub>1</sub> | $E_{T1}/(\text{eV})$ | $N_{01}$ | $T_2/(^{\circ}\text{C})$ | Intensity <sub>2</sub> | $E_{T2}/(\text{eV})$ | $N_{02}$ |
|--------------------|--------------------------|------------------------|----------------------|----------|--------------------------|------------------------|----------------------|----------|
| $\text{CaGdAlO}_4$ | 108.93                   | 83.128                 | 0.766                | 735.608  | 233.01                   | 235.781                | 1.014                | 2086.451 |
| $\text{CaYAlO}_4$  | 110.75                   | 268.534                | 0.770                | 2363.337 | 215.99                   | 198.957                | 0.980                | 1750.998 |

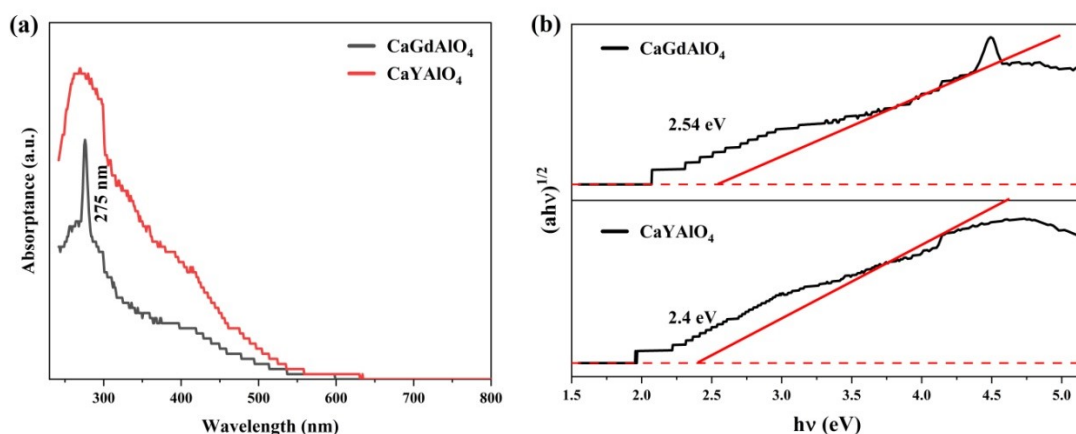

**Fig. S8** UV-vis absorption spectra (a) and the determination of bandgap energies (b) for  $\text{CaGdAlO}_4$  and  $\text{CaYAlO}_4$ . The  $A$  in the Y-axis title of part (b) represents absorbance, which is proportional to the absorption coefficient  $\alpha$ .
